# Supplementary material
Source: publisher figshare collection journal article supplement (https://acs.figshare.com/ndownloader/files/3737023)
Supplement: Supplementary file 1 [file 3737023]

# Supporting Information

## Immunosensing of Atrazine with Antibody-functionalized Cu-MOF

### Conducting Thin Films

Sanjeev K. Bhardwaj<sup>1,2</sup>, Neha Bhardwaj<sup>1,2</sup>, Girish C. Mohanta<sup>1,2</sup>, Pawan Kumar<sup>3</sup>, Amit L. Sharma<sup>1,2</sup>, Ki-Hyun Kim<sup>3\*</sup>, Akash Deep<sup>1,2\*</sup>

<sup>1</sup>Central Scientific Instruments Organisation (CSIR-CSIO),

Sector 30 C, Chandigarh, 160030, India

<sup>2</sup>Academy of Scientific and Innovative Research,

CSIR-CSIO, Sector 30 C, Chandigarh, 160030, India

<sup>3</sup>Department of Civil & Environmental Engineering,

Hanyang University, 222 Wangsimni-Ro,

Seoul 133-791, Republic of Korea

Correspondence: [\\*kkim61@hanyang.ac.kr](mailto:*kkim61@hanyang.ac.kr) (Tel.: +82 2220 2325; Fax: +82 2 2220 1945), and [\\*dr.akashdeep@gmail.com](mailto:*dr.akashdeep@gmail.com) (Tel.: +91 172 2657811 ext. 452)

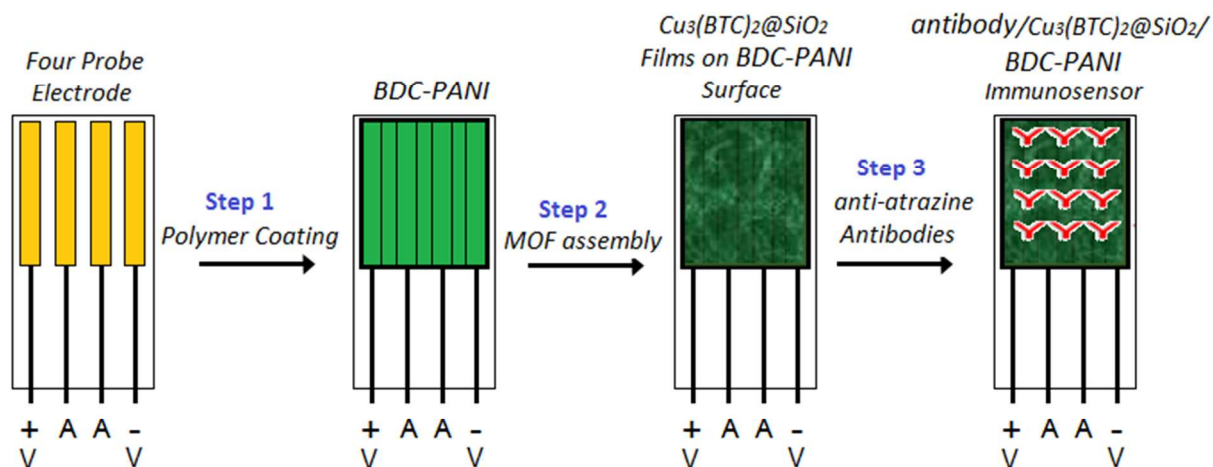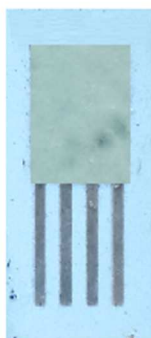

Actual Photo of Sensor

**Step 1:** Spin-casting of BDC-PANI slurry  
**Step 2:** BDC-PANI electrode left to incubate with 0.05 M EDC + 0.01 M NHS followed by spin-casting of  $\text{Cu}_3(\text{BTC})_2@ \text{SiO}_2$   
**Step 3:** Annealing of  $\text{Cu}_3(\text{BTC})_2@ \text{SiO}_2$  electrode at 100 °C followed by immobilization of antibodies

Figure S1. Schematic of the formation of BDC-PANI films on a four-probe electrode device, assembly of  $\text{MOF}@ \text{SiO}_2$  thin films, and immobilization of anti-atrazine antibodies to construct the immunosensor for atrazine detection

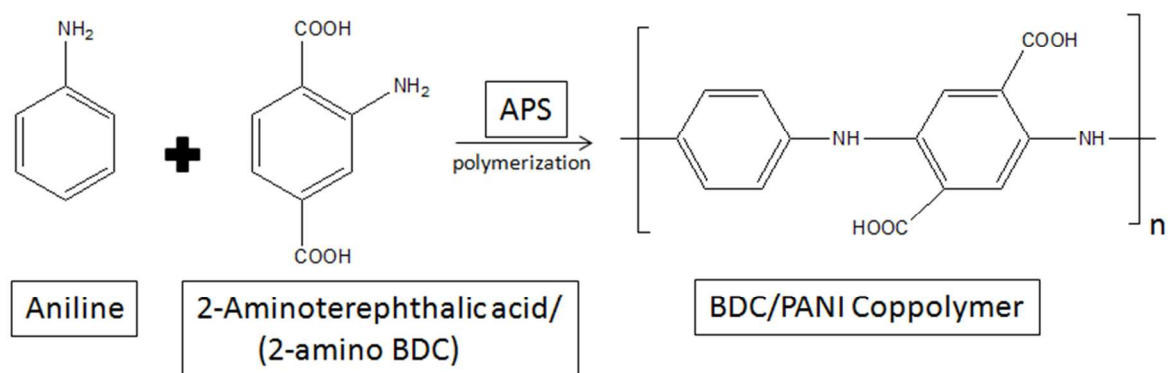

Figure S2. Schematic of the formation of BDC-PANI by the co-polymerization of aniline and NH<sub>2</sub>-BDC

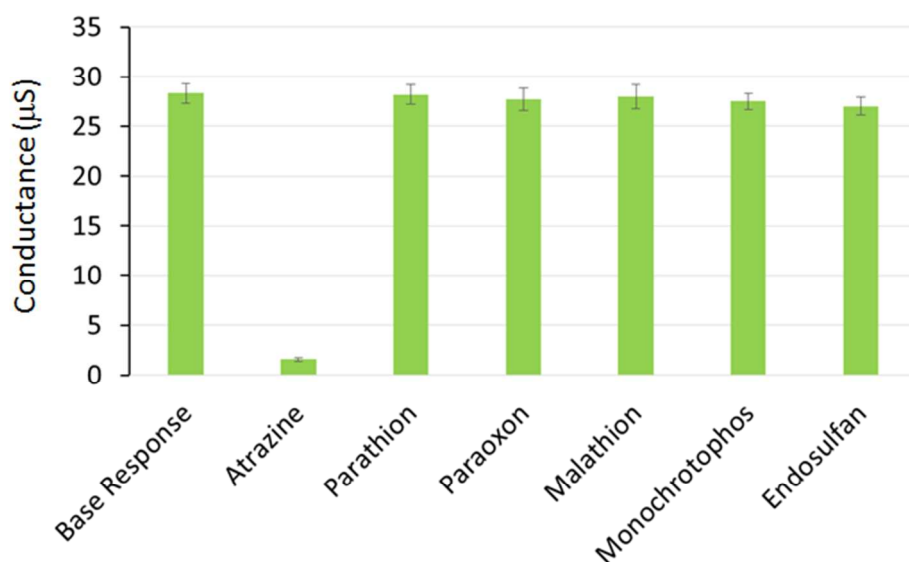

Figure S3. Evaluation of the response of the antibody/Cu<sub>3</sub>(BTC)<sub>2</sub>@SiO<sub>2</sub>/BDC-PANI immunosensor to non-specific pesticides (atrazine and other pesticides = 1 μM)

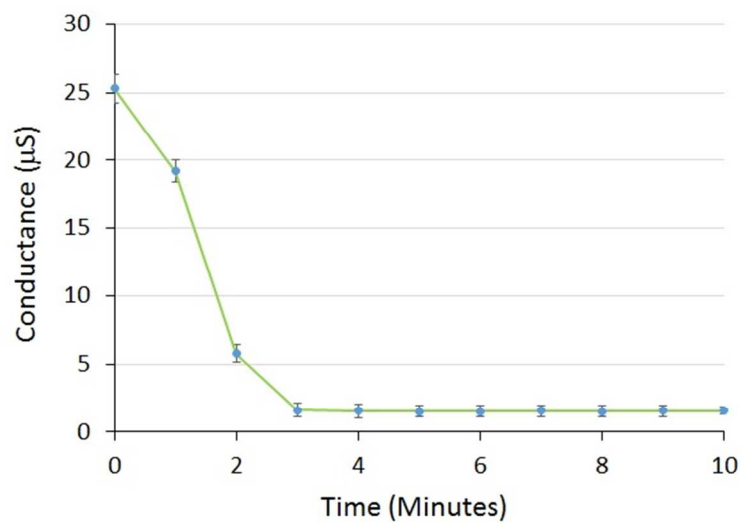

Figure S4. Evaluation of the response time of the antibody/ $\text{Cu}_3(\text{BTC})_2@\text{SiO}_2/\text{BDC-PANI}$  immunosensor (atrazine =  $1 \mu\text{M}$ )

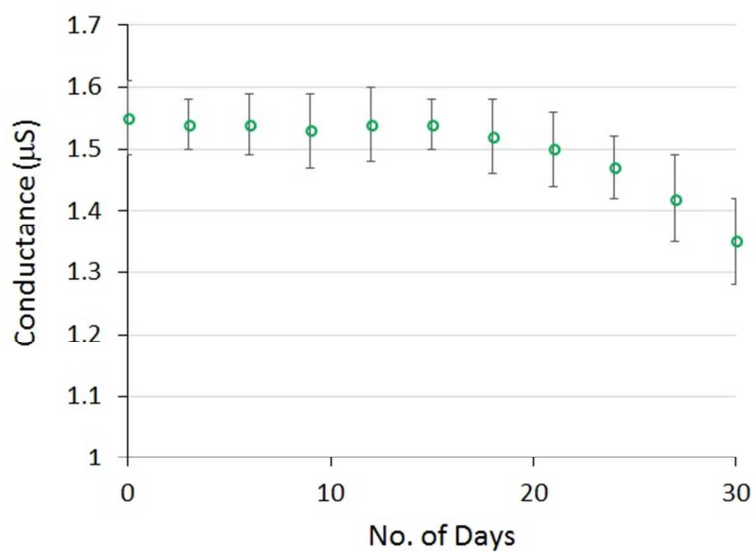

Figure S5. Evaluation of the response time stability of the antibody/ $\text{Cu}_3(\text{BTC})_2@\text{SiO}_2/\text{BDC-PANI}$  immunosensor after prolonged storage (atrazine =  $1 \mu\text{M}$ )

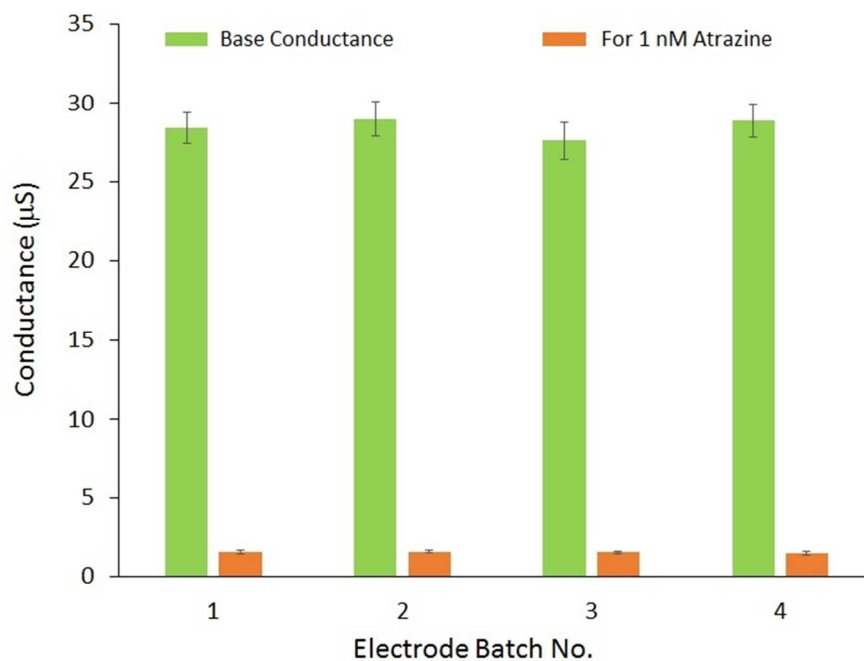

Figure S6. Performance evaluation of different prepared batches of the antibody/ $\text{Cu}_3(\text{BTC})_2@\text{SiO}_2/\text{BDC-PANI}$  immunosensors (atrazine = 1  $\mu\text{M}$ )

**Table S1. Analysis of atrazine in spiked water samples and HPLC-based validation results**

| <b>Sample</b>      | <b>Atrazine concentration</b> | <b>Analysis by the developed immunosensor</b> | <b>HPLC Analysis</b>  |
|--------------------|-------------------------------|-----------------------------------------------|-----------------------|
| 1 – Purified water | 0                             | Not detected                                  | Not detected          |
| 2 – Spiked         | 0.01 nM (2.15 pg/mL)          | $2.06 \pm 0.03$ pg/mL                         | $2.15 \pm 0.02$ pg/mL |
| 3 – Spiked         | 0.1 nM (21.5 pg/mL)           | $20.9 \pm 0.4$ pg/mL                          | $21.6 \pm 0.02$ pg/mL |
| 4 – Spiked         | 0.5 nM (107.5 pg/mL)          | $110 \pm 3.1$ pg/mL                           | $106 \pm 2.3$ pg/mL   |
| 5 – Spiked         | 1.0 nM (215 pg/mL)            | $225 \pm 5.2$ pg/mL                           | $215 \pm 4.5$ pg/mL   |
| 6 – Spiked         | 10 nM (2.15 ng/mL)            | $2.18 \pm 0.04$ ng/mL                         | $2.15 \pm 0.02$ ng/mL |
